# Supplementary material for: The domain swapping of human cystatin C induced by synchrotron radiation
Source: PubMed Central journal article supplement (PMC6561922; doi:10.1038/s41598-019-44811-1), 2019-06-12
Supplement: 41598_2019_44811_MOESM1_ESM.pdf [file 41598_2019_44811_MOESM1_ESM.pdf]

**Supporting information for:**  
**The domain swapping of human cystatin C**  
**induced by synchrotron radiation**

Michał Taube,<sup>†,‡</sup> Zuzanna Pietralik,<sup>†</sup> Aneta Szymańska,<sup>¶</sup> Kosma Szutkowski,<sup>†,§</sup>  
Daniel Clemens,<sup>||</sup> Anders Grubb,<sup>⊥</sup> and Maciej Kozak<sup>\*,†,‡</sup>

<sup>†</sup>*Department of Macromolecular Physics, Adam Mickiewicz University in Poznań,  
Uniwersytetu Poznańskiego 2, 61-614 Poznań, Poland*

<sup>‡</sup>*Joint Laboratory for SAXS Studies, Adam Mickiewicz University in Poznań, Uniwersytetu  
Poznańskiego 2, 61-614 Poznań, Poland*

<sup>¶</sup>*Faculty of Chemistry, University of Gdańsk, Wita Stwosza 63, 80-308 Gdańsk, Poland*

<sup>§</sup>*NanoBioMedical Centre at Adam Mickiewicz University in Poznań, Wszechnicy  
Piaستowskiej 3, 61-614 Poznań, Poland*

<sup>||</sup>*Helmholtz-Zentrum Berlin für Materialien und Energie Lise-Meitner-Campus  
Hahn-Meitner-Platz 1, 14109 Berlin, Germany*

<sup>⊥</sup>*Department of Clinical Chemistry, Lund University Hospital, S-22185 Lund, Sweden*

E-mail: mkozak@amu.edu.pl

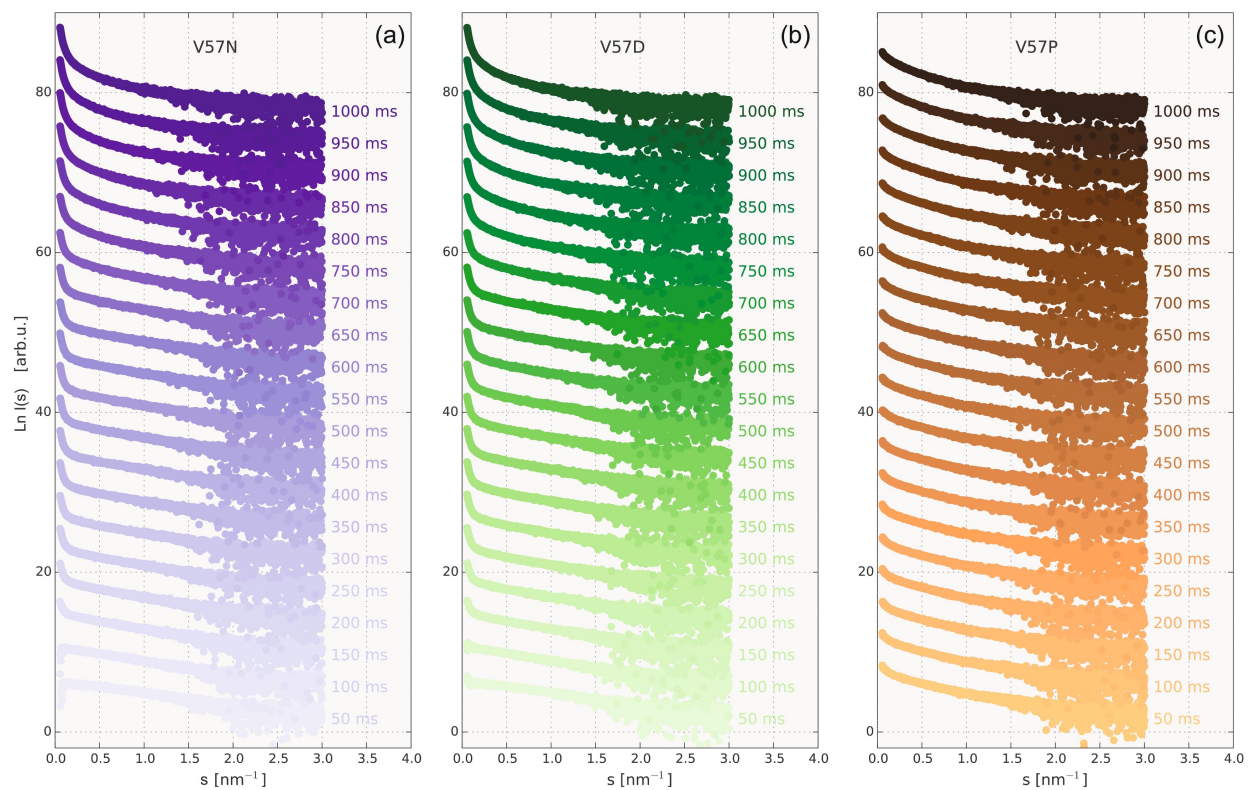

Figure S1: SAXS data (frames 1-20) collected for human cystatin C variants: V57N (a), V57D (b) and V57P (c). The data were shifted for clarity.

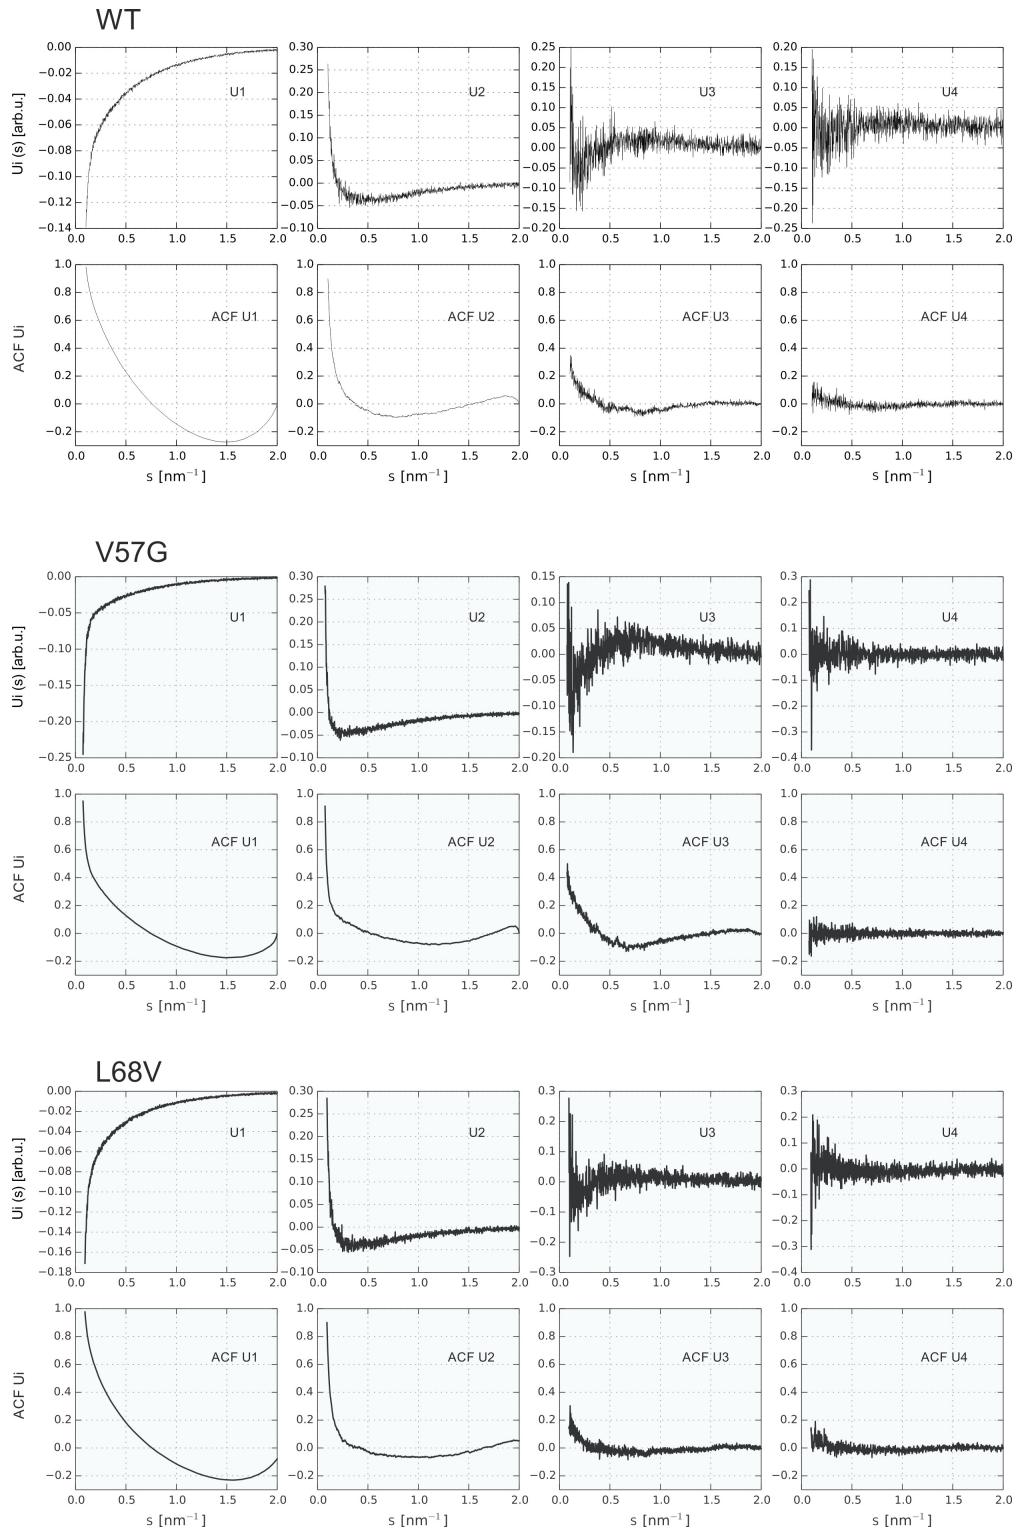

Figure S2: SVD analysis of frames 1-5 (50-250 ms) from TR-SAXS data for the wild type human cystatin C and HCC variants V57G and L68V. In each graph, first row represents four eigenvectors  $U_i$  and second its corresponding autocorrelation function ACF  $U_i$ .

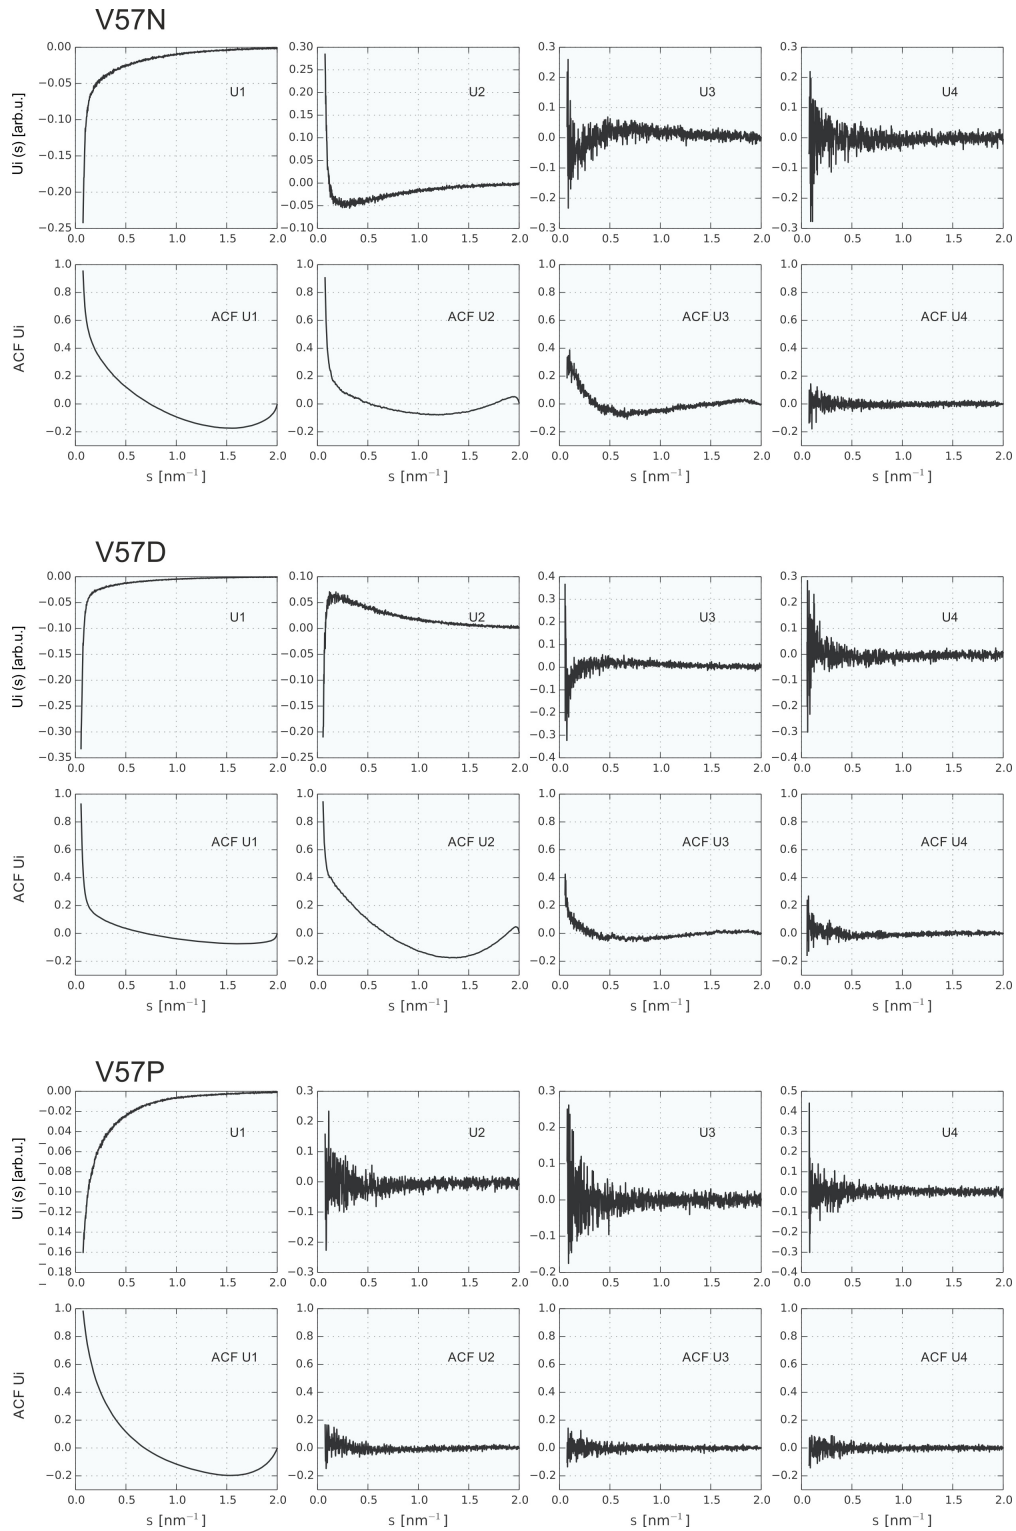

Figure S3: SVD analysis of frames 1-5 (50-250 ms) from TR-SAXS data for human cystatin variants: V57N, V57D and V57P. In each graph, first row represents four eigenvectors  $U_i$  and second its corresponding autocorrelation function  $\text{ACF } U_i$ .



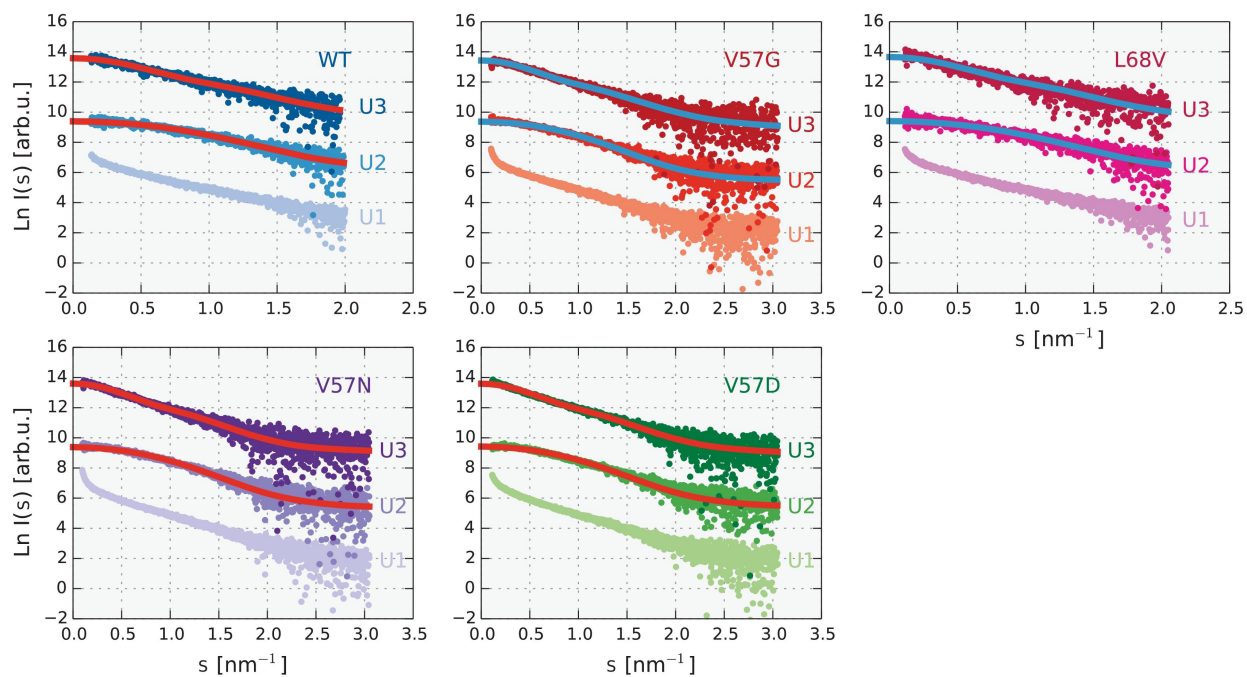

Figure S4: MCR-ALS analysis of SAXS data collected for wild type human cystatin C and its variants: V57G, L68V, V57N, V57D. In each plot reconstructed curves for three SVD detected species: U1-U3 are presented, together with fits of U1 to the stab1-HCC monomer structure (PDB code: 3GAX) and U2 to the structure of wt-HCC dimer (PDB code: 1TIJ). The data were shifted for clarity.

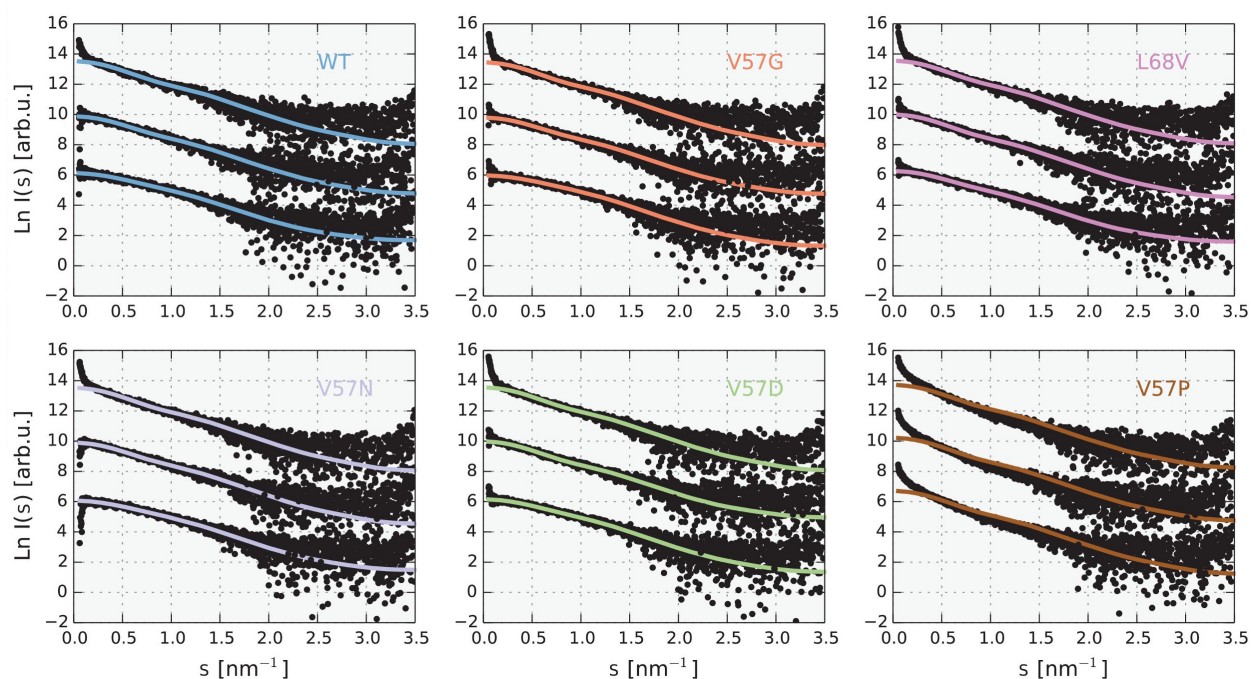

Figure S5: The fits of TR-SAXS data (expositions: 50, 100 and 150 ms), recorded for wild type human cystatin C and its variants, to the monomer (PDB code: 3GAX) and dimer (PDB code:1TLJ) structures of human cystatin C. The fits were calculated using OLIGOMER.<sup>S1</sup>The data were shifted for clarity.

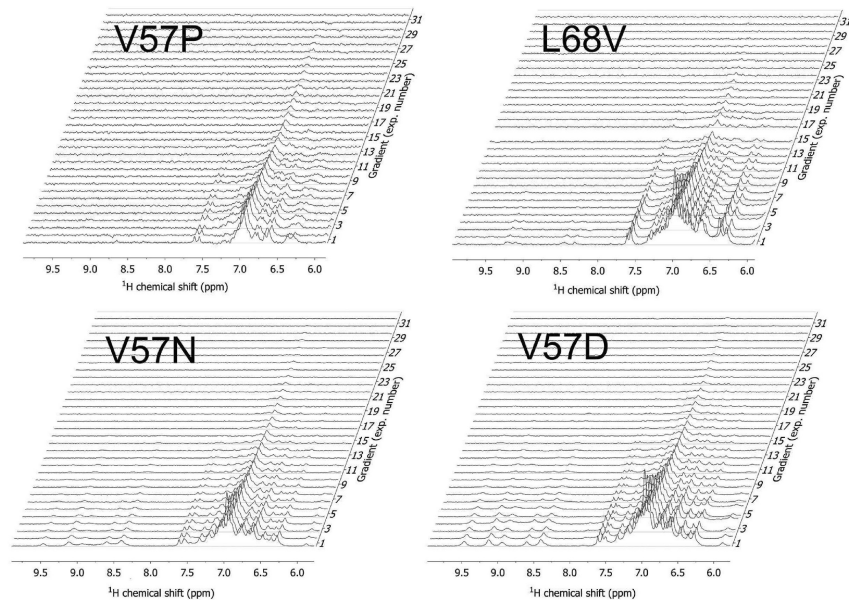

Figure S6: The signal attenuation in the 6-10 ppm region of the diffusion weighted <sup>1</sup>H-NMR spectra of human cystatin C variants: V57P, L68V, V57N, V57D.

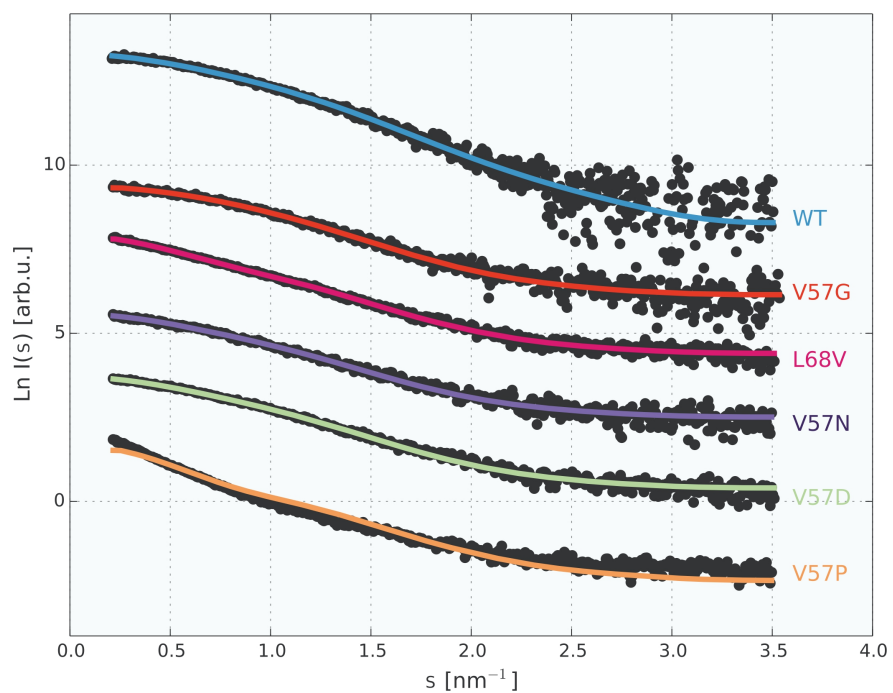

Figure S7: The fits of SAXS data recorded using the laboratory  $\text{GaK}_\alpha$  X-ray source for wild type human cystatin C and its variants, to the monomer (PDB code: 3GAX) and dimer (PDB code:1TIJ) structures of human cystatin C. The fits were calculated using OLIGOMER. The data were shifted for clarity.

| cystatin C variant | 50 ms           | 100 ms          | 150 ms          | 200 ms          | 250 ms           | 300 ms          | 350 ms          |
|--------------------|-----------------|-----------------|-----------------|-----------------|------------------|-----------------|-----------------|
| wt-HCC             | 2.16 nm±0.18 nm | 3.01 nm±0.24 nm | 3.57 nm±0.12 nm | 4.08 nm±0.13 nm | 4.88 nm±0.14 nm  | 5.34 nm±0.21 nm | 6.27 nm±0.28 nm |
| V57G               | 2.03 nm±0.16nm  | 2.84 nm±0.29 nm | 3.50 nm±0.06 nm | 4.27 nm±0.1 nm  | 4.54 nm ±0.12 nm | 5.42 nm±0.2 nm  | 5.6 nm±0.17 nm  |
| L68V               | 2.45nm±0.18 nm  | 3.41 nm±0.22 nm | 3.84 nm±0.07 nm | 4.82 nm±0.12 nm | 5.21 nm±0.21 nm  | n.d.            | n.d.            |
| V57N               | 2.07 nm±0.14 nm | 3.08 nm±0.33 nm | 3.48 nm±0.06 nm | 4.02 nm±0.06 nm | 4.38 nm±0.11 nm  | 4.75 nm±0.13 nm | 5.11 nm±0.19 nm |
| V57D               | 2.16 nm±0.12 nm | 3.00 nm±0.12 nm | 3.86 nm±0.06 nm | 4.39 nm±0.08 nm | 4.81 nm±0.09 nm  | 5.55 nm±0.18 nm | n.d.            |
| V57P               | 4.63 nm±0.21 nm | 4.76 nm±0.23 nm | 4.70 nm±0.22 nm | 4.84 nm±0.21 nm | 5.61 nm±0.22 nm  | 5.05 nm±0.43 nm | 5.03 nm±0.3 nm  |

Table S1:  $R_g$  values for the wild type human cystatin C and its variants estimated on the basis of the TR-SAXS data. n.d. - not determined.

Table S2:  $\chi^2$  value for the fits the structures of monomeric (PDB code: 3GAX) and dimeric (PDB code: 1TIJ) forms of human cystatin C to the reconstructed species U1 and U2 from the MCR-ALS analysis.

| Cystatin C variant | U1 monomer fit $\chi^2$ | U2 dimer fit $\chi^2$ |
|--------------------|-------------------------|-----------------------|
| wt-HCC             | 1.64                    | 1.72                  |
| V57G               | 2.17                    | 1.73                  |
| L68V               | 1.74                    | 1.85                  |
| V57N               | 2.14                    | 1.77                  |
| V57D               | 2.41                    | 2.34                  |

Table S3: Monomer and dimer fractions of HCC variants calculated using OLIGOMER for laboratory SAXS data.

| Cystatin C variant | Monomer fraction | Dimer fraction | $\chi^2$ |
|--------------------|------------------|----------------|----------|
| wt-HCC             | 85.5 %           | 14.5 %         | 1.02     |
| V57G               | 97.9 %           | 2.1 %          | 0.745    |
| L68V               | 50.1 %           | 49.9 %         | 0.83     |
| V57N               | 81.2 %           | 18.8 %         | 0.86     |
| V57D               | 79.9 %           | 20.1 %         | 0.84     |
| V57P               | 0 %              | 100 %          | 14.04    |

## References

- (S1) Konarev, P. V.; Volkov, V. V.; Sokolova, A. V.; Koch, M. H. J.; Svergun, D. I. *J. Appl. Crystallogr.* **2003**, *36*, 1277–1282.
